# Supplementary material for: Innovative Collaboration between a Medical Clinic and a Community Pharmacy: A Case Report
Source: MDPI journal article supplement (doi:10.3390/pharmacy7020062), 2019-06-14
Supplement: s1 [file s1]

**Table S1.** Medication-Related Problems Identified during CMRs (N = 116).

| <b>Medication-Related Problem (MRP)</b> | <b>Frequency (%)</b> |
|-----------------------------------------|----------------------|
| Needs additional therapy                | 45 (38.8)            |
| Suboptimal therapy                      | 22 (19.0)            |
| Unnecessary therapy                     | 18 (15.5)            |
| Nonadherence                            | 14 (12.1)            |
| Dose too low                            | 13 (11.2)            |
| Adverse drug reaction                   | 10 (8.6)             |
| Inappropriate administration/technique  | 8 (6.9)              |

**Table S2.** Pharmacist Actions For Medication-Related Problems (N = 116).

| <b>Pharmacist Action</b>         | <b>Frequency (%)</b> |
|----------------------------------|----------------------|
| Change drug                      | 21 (18.1)            |
| Initiated new therapy            | 16 (13.8)            |
| Discontinued therapy             | 15 (12.9)            |
| Altered administration/technique | 13 (11.2)            |
| Increased dose                   | 9 (7.7)              |
